# Supplementary material for: Poor Water Quality Persists in Diverse Urban Communities
Source: MDPI journal article supplement (doi:10.3390/w15193446), 2023-09-30
Supplement: s1 [file s1]

### Supplementary Materials

Table S1. Total violations across municipalities in Essex and Hudson County, New Jersey (2010-2020; NJ Drinking Water Watch, 2020).

| Municipality          | N Violations | N Nonmetal Violations | N Metal Violations | N Rule Violations |
|-----------------------|--------------|-----------------------|--------------------|-------------------|
| Bayonne City          | 6            | 3                     | 0                  | 3                 |
| Belleville Township   | 77           | 40                    | 6                  | 31                |
| Bloomfield Township   | 44           | 11                    | 7                  | 26                |
| Caldwell Borough      | 4            | 3                     | 0                  | 1                 |
| Cedar Grove           | 12           | 5                     | 2                  | 5                 |
| City of Orange        | 10           | 8                     | 0                  | 2                 |
| East Newark Borough   | 3            | 2                     | 0                  | 1                 |
| East Orange City      | 29           | 17                    | 1                  | 10                |
| Essex Fells           | 12           | 9                     | 0                  | 1                 |
| Fairfield Borough     | 34           | 30                    | 0                  | 4                 |
| Glen Ridge            | 2            | 1                     | 0                  | 1                 |
| Guttenberg            | 7            | 4                     | 2                  | 0                 |
| Harrison Township     | 4            | 2                     | 0                  | 2                 |
| Hoboken Township      | 0            | 0                     | 0                  | 0                 |
| Irvington             | 1            | 1                     | 0                  | 0                 |
| Jersey City           | 1            | 1                     | 0                  | 0                 |
| Kearny Township       | 1            | 1                     | 0                  | 0                 |
| Livingston Township   | 39           | 33                    | 0                  | 3                 |
| Maplewood             | 1            | 1                     | 0                  | 0                 |
| Millburn Township     | 1            | 1                     | 0                  | 0                 |
| Montclair Township    | 3            | 2                     | 0                  | 2                 |
| Newark                | 32           | 15                    | 6                  | 8                 |
| North Bergen Township | 7            | 4                     | 2                  | 0                 |
| North Caldwell        | 11           | 9                     | 0                  | 2                 |

|                       |    |    |   |      |
|-----------------------|----|----|---|------|
| Nutley Township       | 15 | 4  | 0 | 11'' |
| Roseland Township     | 21 | 15 | 1 | 5    |
| Secaucus Township     | 7  | 4  | 2 | 0    |
| South Orange Township | 5  | 4  | 0 | 1    |
| Union City            | 7  | 4  | 2 | 0    |
| Verona Borough        | 29 | 18 | 2 | 9    |
| Weehawken             | 7  | 4  | 2 | 0    |
| West Caldwell         | 2  | 2  | 0 | 0    |
| West New York         | 7  | 4  | 2 | 0    |
| West Orange           | 1  | 1  | 0 | 0    |

Table S2. Most common violations across municipalities in Essex and Hudson County, New Jersey (2010-2020).

| Municipality          | N Lead<br>Violations | N Chlorine<br>Violations | N LCR<br>Violations |
|-----------------------|----------------------|--------------------------|---------------------|
| Bayonne City          | 0                    | 1                        | 3                   |
| Belleville Township   | 4                    | 17                       | 11                  |
| Bloomfield Township   | 4                    | 2                        | 20                  |
| Caldwell Borough      | 0                    | 3                        | 0                   |
| Cedar Grove           | 0                    | 3                        | 3                   |
| City of Orange        | 0                    | 2                        | 1                   |
| East Newark Borough   | 0                    | 2                        | 1                   |
| East Orange City      | 0                    | 1                        | 7                   |
| Essex Fells           | 0                    | 0                        | 0                   |
| Fairfield Borough     | 0                    | 29                       | 0                   |
| Glen Ridge            | 0                    | 0                        | 0                   |
| Guttenberg            | 2                    | 1                        | 0                   |
| Harrison Township     | 0                    | 2                        | 1                   |
| Hoboken Township      | 0                    | 0                        | 0                   |
| Irvington             | 0                    | 0                        | 0                   |
| Jersey City           | 0                    | 0                        | 0                   |
| Kearny Township       | 0                    | 0                        | 0                   |
| Livingston Township   | 0                    | 0                        | 0                   |
| Maplewood             | 0                    | 0                        | 0                   |
| Millburn Township     | 0                    | 0                        | 0                   |
| Montclair Township    | 0                    | 1                        | 1                   |
| Newark                | 6                    | 5                        | 4                   |
| North Bergen Township | 2                    | 1                        | 0                   |
| North Caldwell        | 0                    | 6                        | 1                   |
| Nutley Township       | 0                    | 4                        | 6                   |

|                       |   |    |   |
|-----------------------|---|----|---|
| Roseland Township     | 1 | 11 | 0 |
| Secaucus Township     | 2 | 1  | 0 |
| South Orange Township | 0 | 2  | 0 |
| Union City            | 2 | 1  | 0 |
| Verona Borough        | 0 | 6  | 3 |
| Weehawken             | 2 | 1  | 0 |
| West Caldwell         | 0 | 0  | 0 |
| West New York         | 2 | 1  | 0 |
| West Orange           | 0 | 0  | 0 |

Table S3. Minimum and maximum diversity percentages across Municipalities in Essex and Hudson County, New Jersey (2010-2020) in relation to historic redlining grades.

| Municipality          | Mean HOLC | Min. Diversity | Max Diversity |
|-----------------------|-----------|----------------|---------------|
| Bayonne City          | 3.33      | 25.42          | 27.34         |
| Belleville Township   | 2.83      | 35.05          | 35.67         |
| Bloomfield Township   | 2.25      | 34.76          | 36.70         |
| Caldwell Borough      | 2.33      | 11.03          | 11.44         |
| Cedar Grove           | 1.5       | 9.73           | 9.99          |
| City of Orange        | 2.62      | 82.26          | 83.54         |
| East Newark Borough   | 4         | 29.30          | 34.65         |
| East Orange City      | 2.66      | 92.11          | 93.25         |
| Essex Fells           | 1.5       | 3.36           | 3.63          |
| Fairfield Borough     | -         | 4.12           | 4.29          |
| Glen Ridge            | 2         | 10.89          | 11.22         |
| Guttenberg            | 3         | 26.03          | 27.86         |
| Harrison Township     | 4         | 34.04          | 43.06         |
| Hoboken Township      | 4         | 13.96          | 15.95         |
| Irvington             | 2         | 90.63          | 91.96         |
| Jersey City           | 3.55      | 58.57          | 64.03         |
| Kearny Township       | 2.8       | 21.83          | 23.06         |
| Livingston Township   | 2         | 21.91          | 22.85         |
| Maplewood             | 2.89      | 38.33          | 40.60         |
| Millburn Township     | 1.83      | 17.65          | 32.99         |
| Montclair Township    | 2.55      | 33.99          | 34.90         |
| Newark                | 3         | 68.45          | 70.47         |
| North Bergen Township | 2         | 27.00          | 28.75         |
| North Caldwell        | 2         | 10.80          | 11.42         |
| Nutley Township       | 2         | 15.03          | 15.47         |
| Roseland Township     | 3         | 8.06           | 8.37          |

|                       |      |       |       |
|-----------------------|------|-------|-------|
| Secaucus Township     | 3.5  | 22.92 | 29.59 |
| South Orange Township | -    | 34.80 | 35.73 |
| Union City            | 3.4  | 34.60 | 36.73 |
| Verona Borough        | 2    | 7.01  | 7.16  |
| Weehawken             | 2.5  | 20.62 | 24.20 |
| West Caldwell         | 2    | 5.88  | 5.98  |
| West New York         | 3.33 | 30.15 | 33.22 |
| West Orange           | 1.83 | 38.60 | 40.17 |

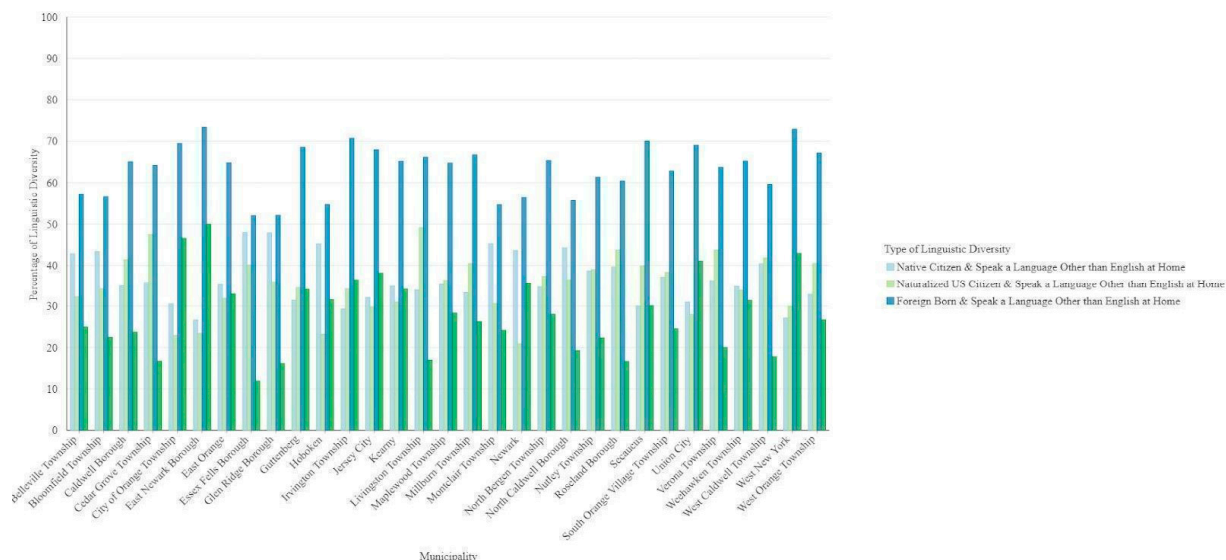

Figure S1. Geographic variation in linguistic diversity among non-US, foreign-born, naturalized citizens (Census, 2020) in the municipalities in Essex and Hudson County, New Jersey (2010-2020).

Table S4. Metal violations among linguistically diverse residents in the municipalities of Essex and Hudson County, New Jersey (2010-2020).

| Violations    | Speak eEnglish very well |      |                             |                                          | Speak English less than very well |      |                             |                                          |
|---------------|--------------------------|------|-----------------------------|------------------------------------------|-----------------------------------|------|-----------------------------|------------------------------------------|
|               | Z                        | P    | No Violation<br>(means±SD%) | One or more<br>violations<br>(means±SD%) | Z                                 | P    | No Violation<br>(means±SD%) | One or more<br>violations<br>(means±SD%) |
| Lead          | -1.91                    | 0.06 | 64.54±10.82                 | 58.87±10.78                              | 1.91                              | 0.06 | 35.46±10.82                 | 41.14±10.78                              |
| IronManganese | 0.91                     | 0.36 | 64.22±10.97                 | 67.33±3.46                               | -0.91                             | 0.36 | 35.78±10.97                 | 32.67±3.46                               |
| Mercury       |                          |      | 64.30±10.86                 |                                          |                                   |      | 35.70±10.86                 |                                          |
| Chromium      |                          |      | 64.30±10.86                 |                                          |                                   |      | 35.70±10.86                 |                                          |
| Cadmium       |                          |      | 64.30±10.86                 |                                          |                                   |      | 35.70±10.86                 |                                          |
| Barium        |                          |      | 64.30±10.86                 |                                          |                                   |      | 35.70±10.86                 |                                          |
| Arsenic       | 0.98                     | 0.33 | 64.27±10.87                 | 73.00±0.00                               | -0.98                             | 0.33 | 35.73±10.87                 | 27.00±0.00                               |
| Silver        |                          |      | 64.30±10.86                 |                                          |                                   |      | 35.70±10.86                 |                                          |
| Manganese     |                          |      | 64.30±10.86                 |                                          |                                   |      | 35.70±10.86                 |                                          |

|                 |  |  |             |  |  |  |             |  |
|-----------------|--|--|-------------|--|--|--|-------------|--|
| Iron            |  |  | 64.30±10.86 |  |  |  | 35.70±10.86 |  |
| Nickel          |  |  | 64.30±10.86 |  |  |  | 35.70±10.86 |  |
| Thallium Total  |  |  | 64.30±10.86 |  |  |  | 35.70±10.86 |  |
| Beryllium Total |  |  | 64.30±10.86 |  |  |  | 35.70±10.86 |  |
| Zinc            |  |  | 64.30±10.86 |  |  |  | 35.70±10.86 |  |

Table S5. Metal violations among BIPOC residents including residents who speak a language other than English at home in the municipalities of Essex and Hudson County, New Jersey (2010-2020).

| Violations      | Foreign Born |          |                             |                                          | Not a US Citizen |          |                             |                                          |
|-----------------|--------------|----------|-----------------------------|------------------------------------------|------------------|----------|-----------------------------|------------------------------------------|
|                 | <i>Z</i>     | <i>P</i> | No Violation<br>(means±SD%) | One or more<br>violations<br>(means±SD%) | <i>Z</i>         | <i>P</i> | No Violation<br>(means±SD%) | One or more<br>violations<br>(means±SD%) |
| Lead            | -1.38        | 0.16     | 63.36±8.08                  | 61.48±6.74                               | 1.36             | 0.17     | 27.82±11.37                 | 31.1±7.611                               |
| IronManganese   | -1.11        | 0.27     | 63.31±8.08                  | 61.73±5.70                               | -1.09            | 0.28     | 28.05±11.29                 | 24.22±9.18                               |
| Mercury         | —            | —        | 63.28±8.03                  | 00.00±00.00                              | —                | —        | 27.96±11.24                 | 00.00±00.00                              |
| Chromium        | —            | —        | 63.28±8.03                  | 00.00±00.00                              | —                | —        | 27.96±11.24                 | 00.00±00.00                              |
| Cadmium         | —            | —        | 63.28±8.03                  | 00.00±00.00                              | —                | —        | 27.96±11.24                 | 00.00±00.00                              |
| Barium          | —            | —        | 63.28±8.03                  | 00.00±00.00                              | —                | —        | 27.96±11.24                 | 00.00±00.00                              |
| Arsenic         | -0.68        | 0.49     | 63.29±8.03                  | 59.80±0.00                               | -0.49            | 0.62     | 27.98±23.10                 | 0.17±0.00                                |
| Silver          | —            | —        | 63.28±8.03                  | 00.00±00.00                              | —                | —        | 27.96±11.24                 | 00.00±00.00                              |
| Manganese       | —            | —        | 63.28±8.03                  | 00.00±00.00                              | —                | —        | 27.96±11.24                 | 00.00±00.00                              |
| Iron            | —            | —        | 63.28±8.03                  | 00.00±00.00                              | —                | —        | 27.96±11.24                 | 00.00±00.00                              |
| Nickel          | —            | —        | 63.28±8.03                  | 00.00±00.00                              | —                | —        | 27.96±11.24                 | 00.00±00.00                              |
| Thallium Total  | —            | —        | 63.28±8.03                  | 00.00±00.00                              | —                | —        | 27.96±11.24                 | 00.00±00.00                              |
| Beryllium Total | —            | —        | 63.28±8.03                  | 00.00±00.00                              | —                | —        | 27.96±11.24                 | 00.00±00.00                              |
| Zinc            | —            | —        | 63.28±8.03                  | 00.00±00.00                              | —                | —        | 27.96±11.24                 | 00.00±00.00                              |



Table S6. Nonmetal violations among linguistically diverse residents in the municipalities of Essex and Hudson County, New Jersey (2010-2020).

| Violations                  | Speak english very well |      |                             |                                          | Speak english less than very well |      |                             |                                          |
|-----------------------------|-------------------------|------|-----------------------------|------------------------------------------|-----------------------------------|------|-----------------------------|------------------------------------------|
|                             | Z                       | P    | No Violation<br>(means±SD%) | One or more<br>violations<br>(means±SD%) | Z                                 | P    | No Violation<br>(means±SD%) | One or more<br>violations<br>(means±SD%) |
| <i>E.coli</i>               | 0.38                    | 0.71 | 64.27±10.93                 | 64.94±9.15                               | -0.39                             | 0.70 | 35.73±10.93                 | 35.04±9.13                               |
| TTHM                        | 0.64                    | 0.52 | 64.21±10.92                 | 66.02±9.58                               | -0.64                             | 0.52 | 35.79±10.92                 | 33.98±9.58                               |
| Nitrate                     | 0.20                    | 0.84 | 64.29±10.89                 | 64.93±10.04                              | -0.20                             | 0.84 | 35.71±10.89                 | 35.07±10.04                              |
| Fluoride                    |                         |      | 64.30±10.86                 |                                          |                                   |      | 35.70±10.86                 |                                          |
| Selenium                    |                         |      | 64.30±10.86                 |                                          |                                   |      | 35.70±10.86                 |                                          |
| PFNA                        |                         |      | 64.30±10.86                 |                                          |                                   |      | 35.70±10.86                 |                                          |
| 1,2,3 Trichloropropane      | 0.09                    | 0.92 | 64.29±10.90                 | 65.20±5.09                               | -0.09                             | 0.92 | 35.71±10.90                 | 34.80±5.09                               |
| 1,2-Dibromo-3-Chloropropane | 0.09                    | 0.92 | 64.29±10.90                 | 65.20±5.09                               | -0.09                             | 0.92 | 35.71±10.90                 | 34.80±5.09                               |
| Ethylene Dibromide          | 0.09                    | 0.92 | 64.29±10.90                 | 65.20±5.09                               | -0.09                             | 0.92 | 35.71±10.90                 | 34.80±5.09                               |
| TDS                         |                         |      | 64.30±10.86                 |                                          |                                   |      | 35.70±10.86                 |                                          |
| Trichloroethylene           |                         |      | 64.30±10.86                 |                                          |                                   |      | 35.70±10.86                 |                                          |
| Sodium                      |                         |      | 64.30±10.86                 |                                          |                                   |      | 35.70±10.86                 |                                          |
| pH                          |                         |      | 64.30±10.86                 |                                          |                                   |      | 35.70±10.86                 |                                          |
| 1-1 Dichloroethylene        |                         |      | 64.30±10.86                 |                                          |                                   |      | 35.70±10.86                 |                                          |
| Tetrachloroethylene         |                         |      | 64.30±10.86                 |                                          |                                   |      | 35.70±10.86                 |                                          |
| Cryptosporidium             | -1.93                   | 0.05 | 64.45±10.86                 | 57.92±9.33                               | 1.94                              | 0.05 | 35.53±10.86                 | 42.08±9.33                               |
| Color                       |                         |      | 64.30±10.86                 |                                          |                                   |      | 35.70±10.86                 |                                          |
| Cyanide                     | -1.45                   | 0.15 | 64.34±10.84                 | 48.60±0.00                               | 1.45                              | 0.15 | 35.66±10.84                 | 51.40±0.00                               |
| Turbidity                   | -2.41                   | 0.02 | 64.45±10.82                 | 54.44±9.53                               | 2.42                              | 0.02 | 35.52±10.82                 | 45.57±8.53                               |
| Antimony Total              |                         |      | 64.30±10.86                 |                                          |                                   |      | 35.70±10.86                 |                                          |
| Copper Free                 |                         |      | 64.30±10.86                 |                                          |                                   |      | 35.70±10.86                 |                                          |
| Combined Uranium            |                         |      | 64.30±10.86                 |                                          |                                   |      | 35.70±10.86                 |                                          |
| Inorganics                  | 0.20                    | 0.84 | 64.29±10.87                 | 65.30±10.75                              | -0.20                             | 0.84 | 35.71±10.87                 | 34.70±10.75                              |
| Asbestos                    | 0.77                    | 0.44 | 64.28±10.87                 | 71.50±0.00                               | -0.77                             | 0.44 | 35.72±10.87                 | 28.50±0.00                               |

|                               |      |      |             |             |       |      |             |             |
|-------------------------------|------|------|-------------|-------------|-------|------|-------------|-------------|
| Fecal Coliform                |      |      | 64.30±10.86 |             |       |      | 35.70±10.86 |             |
| Stage 2 TTHM HAA5             | 0.02 | 0.98 | 64.28±10.89 | 64.58±10.58 | -0.02 | 0.98 | 35.72±10.89 | 35.42±10.58 |
| Total THMS HAA5               | 0.98 | 0.32 | 64.26±10.88 | 70.85±4.31  | -0.98 | 0.32 | 35.74±10.88 | 29.15±4.31  |
| Chlorine                      | 1.70 | 0.09 | 63.89±10.64 | 67.18±12.07 | -1.70 | 0.09 | 36.11±10.64 | 32.82±12.07 |
| Total Haloacetic (Acids) HAA5 |      |      | 64.30±10.86 |             |       |      | 35.70±10.86 |             |
| Coliform                      |      |      | 64.30±10.86 |             |       |      | 35.70±10.86 |             |

Table S7. Nonmetal violations among BIPOC residents including residents who speak a language other than English at home in the municipalities of Essex and Hudson County, New Jersey (2010-2020).

| Violations                  | Foreign Born |        |                             |                                          | Not a US Citizen |      |                             |                                          |
|-----------------------------|--------------|--------|-----------------------------|------------------------------------------|------------------|------|-----------------------------|------------------------------------------|
|                             | Z            | P      | No Violation<br>(means±SD%) | One or more<br>violations<br>(means±SD%) | Z                | P    | No Violation<br>(means±SD%) | One or more<br>violations<br>(means±SD%) |
| <i>E.coli</i>               | 0.32         | 0.75   | 63.23±8.11                  | 64.55±5.21                               | -0.06            | 0.95 | 27.95±11.25                 | 28.43±11.64                              |
| TTHM                        | -3.79        | 0.0001 | 63.54±8.09                  | 58.12±4.08                               | -1.64            | 0.10 | 28.16±11.37                 | 24.23±7.90                               |
| Nitrate                     | -1.17        | 0.24   | 63.31±8.08                  | 61.24±4.03                               | -0.83            | 0.41 | 28.03±11.26                 | 24.43±10.28                              |
| Fluoride                    | —            | —      | 63.28±8.03                  | 00.00±00.00                              | —                | —    | 27.96±11.25                 | 00.00±00.00                              |
| Selenium                    | —            | —      | 63.28±8.03                  | 00.00±00.00                              | —                | —    | 27.96±11.25                 | 00.00±00.00                              |
| PFNA                        | —            | —      | 63.28±8.03                  | 00.00±00.00                              | —                | —    | 27.96±11.25                 | 00.00±00.00                              |
| 1,2,3 Trichloropropane      | -2.16        | 0.03   | 63.41±7.85                  | 46.6±14.05                               | -2.72            | 0.01 | 28.11±11.15                 | 8.77±4.55                                |
| 1,2-Dibromo-3-Chloropropane | -2.16        | 0.03   | 63.41±7.85                  | 46.6±14.05                               | -2.72            | 0.01 | 28.11±11.15                 | 8.77±4.55                                |
| Ethylene Dibromide          | -2.16        | 0.03   | 63.41±7.85                  | 46.6±14.05                               | -2.72            | 0.01 | 28.11±11.15                 | 8.77±4.55                                |
| TDS                         | —            | —      | 63.28±8.03                  | 00.00±00.00                              | —                | —    | 27.96±11.25                 | 00.00±00.00                              |
| Trichloroethylene           | —            | —      | 63.28±8.03                  | 00.00±00.00                              | —                | —    | 27.96±11.25                 | 00.00±00.00                              |
| Sodium                      | —            | —      | 63.28±8.03                  | 00.00±00.00                              | —                | —    | 27.96±11.25                 | 00.00±00.00                              |
| Ph                          | —            | —      | 63.28±8.03                  | 00.00±00.00                              | —                | —    | 27.96±11.25                 | 00.00±00.00                              |
| 1-1 Dichloroethylene        | —            | —      | 63.28±8.03                  | 00.00±00.00                              | —                | —    | 27.96±11.25                 | 00.00±00.00                              |
| Tetrachloroethylene         | —            | —      | 63.28±8.03                  | 00.00±00.00                              | —                | —    | 27.96±11.25                 | 00.00±00.00                              |
| Cryptosporidium             | 1.77         | 0.08   | 63.16±8.08                  | 67.47±4.11                               | 1.49             | 0.14 | 27.84±11.30                 | 32.61±7.97                               |
| Color                       | —            | —      | 63.28±8.03                  | 00.00±00.00                              | —                | —    | 27.96±11.25                 | 00.00±00.00                              |
| Cyanide                     | -1.29        | 0.20   | 63.30±54.80                 | 70.01±0.00                               | 1.00             | 0.31 | 27.94±11.25                 | 37.80±0.00                               |
| Turbidity                   | 0.53         | 0.60   | 63.24±8.07                  | 65.37±4.62                               | 1.78             | 0.07 | 27.84±11.28                 | 34.56±6.59                               |
| Antimony Total              | —            | —      | 63.28±8.03                  | 00.00±00.00                              | —                | —    | 27.96±11.25                 | 00.00±00.00                              |
| Copper Free                 | —            | —      | 63.28±8.03                  | 00.00±00.00                              | —                | —    | 27.96±11.25                 | 00.00±00.00                              |
| Combined Uranium            | —            | —      | 63.28±8.03                  | 00.00±00.00                              | —                | —    | 27.96±11.25                 | 00.00±00.00                              |

|                               |       |      |            |             |       |      |             |             |
|-------------------------------|-------|------|------------|-------------|-------|------|-------------|-------------|
| Inorganics                    | 1.38  | 0.17 | 63.24±8.03 | 70.05±3.61  | 0.95  | 0.34 | 27.93±11.27 | 33.70±2.40  |
| Asbestos                      | -0.09 | 0.92 | 63.28±8.04 | 63.70±0.00  | 0.45  | 0.65 | 27.96±11.26 | 31.30±0.00  |
| Fecal Coliform                | —     | —    | 63.28±8.03 | 00.00±00.00 | —     | —    | 27.96±11.25 | 00.00±00.00 |
| Stage 2 TTHM HAA5             | -0.67 | 0.51 | 63.31±8.11 | 62.69±6.45  | 0.40  | 0.69 | 27.94±11.35 | 28.35±9.14  |
| Total THMS HAA5               | -1.50 | 0.13 | 63.31±8.03 | 56.10±4.95  | -1.72 | 0.09 | 28.03±11.23 | 14.75±6.72  |
| Chlorine                      | -1.60 | 0.11 | 63.49±8.02 | 61.75±7.98  | -0.70 | 0.49 | 28.07±11.03 | 27.21±12.77 |
| Total Haloacetic (Acids) HAA5 | —     | —    | 63.28±8.03 | 00.00±00.00 | —     | —    | 27.96±11.25 | 00.00±00.00 |
| Coliform                      | —     | —    | 63.28±8.03 | 00.00±00.00 | —     | —    | 27.96±11.25 | 00.00±00.00 |

Table S8. Rule violations among linguistically diverse residents in the municipalities of Essex and Hudson County, New Jersey (2010-2020).

| Violations                  | Speak english very well |       |                             |                                          | Speak english less than very well |       |                             |                                          |
|-----------------------------|-------------------------|-------|-----------------------------|------------------------------------------|-----------------------------------|-------|-----------------------------|------------------------------------------|
|                             | Z                       | P     | No Violation<br>(means±SD%) | One or more<br>violations<br>(means±SD%) | Z                                 | P     | No Violation<br>(means±SD%) | One or more<br>violations<br>(means±SD%) |
| LCR                         | -0.52                   | 0.60  | 64.38±11.01                 | 63.14±8.71                               | 0.52                              | 0.60  | 35.62±11.01                 | 36.86±8.71                               |
| Consumer Confidence Rule    | 2.01                    | 0.04  | 63.91±10.97                 | 67.50±9.47                               | -2.01                             | 0.04  | 36.09±10.97                 | 32.50±9.47                               |
| State Rule                  | -0.17                   | 0.86  | 64.31±10.88                 | 63.20±10.39                              | 0.17                              | 0.86  | 35.69±10.88                 | 36.80±10.39                              |
| Revised Total Coliform Rule | 0.74                    | 0.46  | 64.24±10.88                 | 68.15±9.44                               | -0.74                             | 0.46  | 35.76±10.88                 | 31.85±9.44                               |
| WQP Initial                 | 1.21                    | 0.23  | 64.26±10.87                 | 72.05±0.64                               | -1.21                             | 0.23  | 35.74±10.87                 | 27.95±0.64                               |
| Public Notice               | 0.32                    | 0.75  | 64.29±10.87                 | 68.00±0.00                               | -0.32                             | 0.75  | 35.71±10.87                 | 32.00±0.00                               |
| DBP Stage 1                 |                         |       | 64.30±10.86                 |                                          |                                   |       | 35.70±10.86                 |                                          |
| VOCs State                  |                         |       | 64.30±10.86                 |                                          |                                   |       | 35.70±10.86                 |                                          |
| RAD_M&R Historical          |                         |       | 64.30±10.86                 |                                          |                                   |       | 35.70±10.86                 |                                          |
| VOC Phase 1                 |                         |       | 64.30±10.86                 |                                          |                                   |       | 35.70±10.86                 |                                          |
| Filter Backwash Rule        |                         |       | 64.30±10.86                 |                                          |                                   |       | 35.70±10.86                 |                                          |
| VOCS Federal                | -1.48                   | 0.14  | 64.42±10.88                 | 59.07±8.80                               | 1.48                              | 0.14  | 35.58±10.88                 | 40.93±8.80                               |
| IESWTR                      | -2.62                   | 0.009 | 47.83±10.80                 | 47.83±0.86                               | 2.62                              | 0.009 | 35.57±10.80                 | 52.17±0.86                               |

Table S9. Rule violations among BIPOC residents including residents who speak a language other than English at home in the municipalities of Essex and Hudson County, New Jersey (2010-2020).

| Violations               | Foreign Born |        |                                |                                          | Not a US Citizen |        |                                |                                          |
|--------------------------|--------------|--------|--------------------------------|------------------------------------------|------------------|--------|--------------------------------|------------------------------------------|
|                          | Z            | P      | No Violation<br>(means±SD<br>) | One or more<br>violations<br>(means±SD%) | Z                | P      | No Violation<br>(means±SD<br>) | One or more<br>violations<br>(means±SD%) |
| LCR                      | -1.34        | 0.18   | 63.35±8.11                     | 62.33±6.88                               | -0.01            | 0.99   | 27.95±11.26                    | 28.11±11.21                              |
| Consumer Confidence Rule | -3.99        | <.0001 | 63.80±7.89                     | 58.88±7.91                               | -3.65            | 0.0003 | 28.67±11.16                    | 22.02±10.30                              |

|                             |       |      |            |            |       |      |             |             |
|-----------------------------|-------|------|------------|------------|-------|------|-------------|-------------|
| State Rule                  | -1.43 | 0.15 | 63.32±8.05 | 59.60±5.17 | -0.27 | 0.79 | 27.99±11.27 | 26.1±9.73   |
| Revised Total Coliform Rule | -0.85 | 0.40 | 63.32±8.00 | 60.28±9.82 | -0.12 | 0.90 | 27.98±11.26 | 26.75±11.58 |
| WQP Initial                 | -1.20 | 0.23 | 63.30±8.04 | 58.75±0.63 | -0.17 | 0.86 | 27.97±11.27 | 26.4±1.84   |
| Public Notice               | -1.25 | 0.21 | 63.30±8.04 | 58.50±1.41 | -1.18 | 0.24 | 28.01±11.24 | 18.60±11.17 |
| DBP Stage 1                 | —     | —    | 63.28±8.03 | 0.00±0.00  | —     | —    | 27.96±11.25 | 0.00±0.00   |
| VOCs State                  | —     | —    | 63.28±8.03 | 0.00±0.00  | —     | —    | 27.96±11.25 | 0.00±0.00   |
| RAD_M&R Historical          | —     | —    | 63.28±8.03 | 0.00±0.00  | —     | —    | 27.96±11.25 | 0.00±0.00   |
| VOC Phase 1                 | —     | —    | 63.28±8.03 | 0.00±0.00  | —     | —    | 27.96±11.25 | 0.00±0.00   |
| Filter Backwash Rule        | —     | —    | 63.28±8.03 | 0.00±0.00  | —     | —    | 27.96±11.25 | 0.00±0.00   |
| VOCS Federal                | 1.14  | 0.25 | 63.20±8.07 | 66.34±5.47 | 0.04  | 0.96 | 27.98±11.21 | 0.54±0.30   |
| IESWTR                      | -2.33 | 0.02 | 63.35±8.01 | 53.73±1.01 | 0.72  | 0.47 | 27.93±11.26 | 31.93±9.73  |
